# Supplementary material for: Point Mutations of Nicotinic Receptor α1 Subunit Reveal New Molecular Features of G153S Slow-Channel Myasthenia
Source: PubMed Central journal article supplement (PMC7956382; doi:10.3390/molecules26051278), 2021-02-26
Supplement: molecules-26-01278-s001.pdf [file molecules-26-01278-s001.pdf]

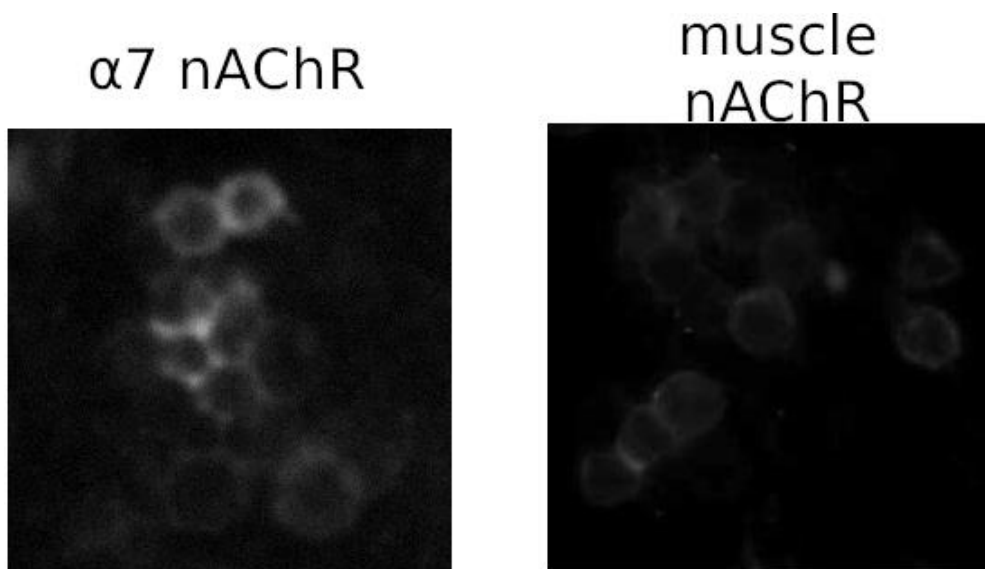

Figure S1. Comparison of  $\alpha 7$  nAChR expression co-expressed with NACHO and Ric-3 chaperone proteins. Cells are stained with Alexa Fluor 555  $\alpha$ -bungarotoxin (100 nM).

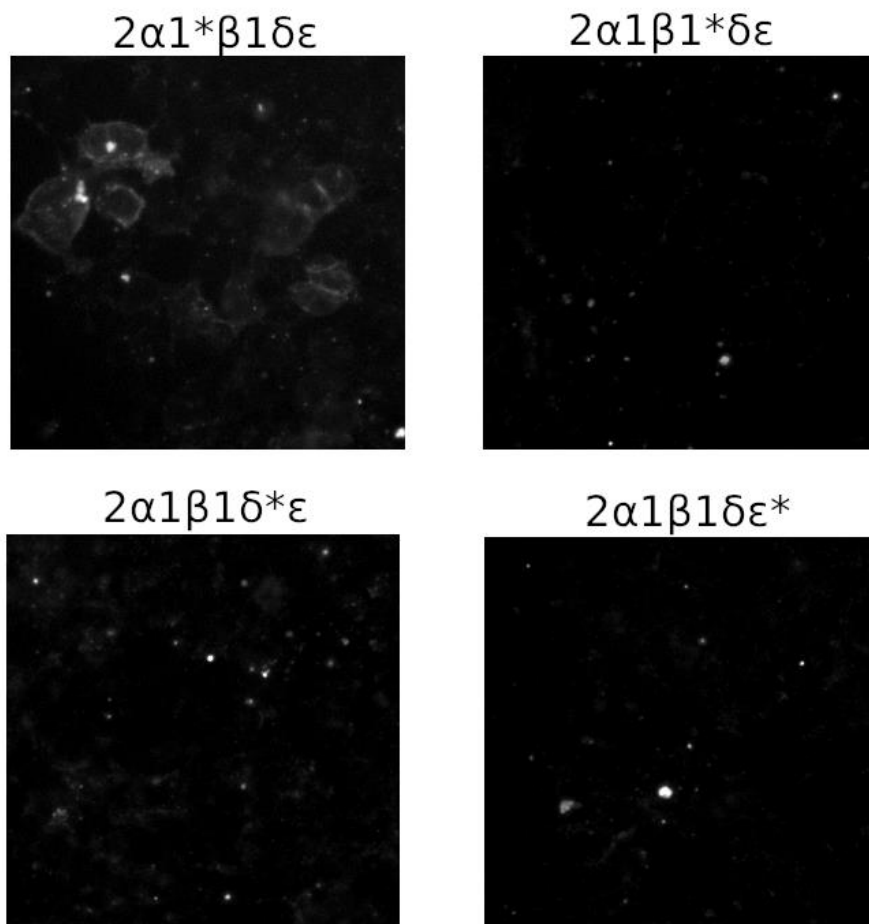

Figure S2. Expression of diverse muscle nAChR subunit combinations, demonstrating that all four muscle nAChR subunits ( $\alpha 1$ ,  $\beta 1$ ,  $\delta$  and  $\epsilon$ ) is needed to produce detectable amounts of surface expressed receptors. Asterisc denotes the mutated non-expressing subunit gene used in the transfection protocol.
